# Supplementary material for: Association between vision impairment and mortality: a systematic review and meta-analysis
Source: PubMed Central journal article supplement (PMC7966688; doi:10.1016/s2214-109x(20)30549-0), 2021-02-16
Supplement: mmc1.pdf [file mmc1.pdf]

# THE LANCET

## Global Health

### Supplementary appendix

This appendix formed part of the original submission and has been peer reviewed. We post it as supplied by the authors.

Supplement to: Ehrlich JR, Ramke J, Macleod D, et al. Association between vision impairment and mortality: a systematic review and meta-analysis. *Lancet Glob Health* 2021; published online Feb 16. [http://dx.doi.org/10.1016/S2214-109X\(20\)30549-0](http://dx.doi.org/10.1016/S2214-109X(20)30549-0).

## **APPENDIX 1.**

### **Contents**

**Full Search Terms... pages 2-5**

## **APPENDIX 2.**

### **Contents**

**Figure 1. PRISMA Checklist... pages 6-7**

## **APPENDIX 3.**

### **Contents**

**Figure 1. Random-effects meta-analysis results showing the minimally-adjusted pooled hazard of mortality... page 8**

**Figure 2. Funnel plot... page 9**

## APPENDIX 1. Full Search Terms

### Text 1. MEDLINE

1. exp eye diseases/
2. Visually Impaired Persons/
3. ((low\$ or handicap\$ or subnormal\$ or impair\$ or partial\$ or disab\$ or disorder\$ or loss\$ or limit\$) adj3 (vision or visual\$ or sight\$)).tw.
4. ((macul\$ or retina\$ or choroid\$) adj3 degener\$).tw.
5. ((macul\$ or retina\$ or choroid\$) adj3 neovasc\$).tw.
6. (AMD or ARMD).tw.
7. ((diabet\$ or proliferative or non-proliferative or pre-proliferative) adj4 retinopath\$).tw.
8. (diabet\$ adj2 (eye\$ or vision or visual\$ or sight\$)).tw.
9. glaucoma\$.tw.
10. cataract\$.tw.
11. blindness.tw.
12. Visual Acuity/
13. visual acuit\$.tw.
14. Contrast Sensitivity/
15. (contrast adj2 sensitivity).tw.
16. Depth Perception/
17. stereopsis.tw.
18. (stereo adj1 acuit\$).tw.
19. Visual Fields/
20. ((visual\$ or vision) adj2 function\$).tw.
21. or/1-20
22. exp Mortality/
23. Death Certificates/
24. mortality.tw.
25. death\$.tw.
26. (fatality or fatalities).tw.
27. or/22-26
28. Cohort Studies/
29. Longitudinal Studies/
30. (cohort\$ or longitudinal).tw.
31. Cross-Sectional Studies/
32. "Surveys and Questionnaires"/

33. Health Surveys/
34. (survey or surveys).tw.
35. or/28-34
36. 21 and 27 and 35
37. (neonate\$ or preterm\$ or prematurity or infant\$ or child\$).tw.
38. visual analog\$ scale.tw.
39. (case adj2 report\$).tw.
40. (animal or mouse or mice or rat or rats).ti.
41. or/37-40
42. 36 not 41

## **Text 2. Embase**

1. exp eye disease/co, cn, di, dm, dr, dt, ep, et, pc, rt, rh, su, th [Complication, Congenital Disorder, Diagnosis, Disease Management, Drug Resistance, Drug Therapy, Epidemiology, Etiology, Prevention, Radiotherapy, Rehabilitation, Surgery, Therapy]
2. exp visual impairment/
3. ((low\$ or handicap\$ or subnormal\$ or impair\$ or partial\$ or disab\$ or disorder\$ or loss\$ or limit\$) adj3 (vision or visual\$ or sight\$)).tw.
4. ((macul\$ or retina\$ or choroid\$) adj3 degener\$).tw.
5. ((macul\$ or retina\$ or choroid\$) adj3 neovasc\$).tw.
6. (AMD or ARMD).tw.
7. ((diabet\$ or proliferative or non-proliferative or pre-proliferative) adj4 retinopath\$).tw.
8. (diabet\$ adj2 (eye\$ or vision or visual\$ or sight\$)).tw.
9. glaucoma\$.tw.
10. cataract\$.tw.
11. blindness.tw.
12. visual acuity/
13. visual acuit\$.tw.
14. contrast sensitivity/
15. (contrast adj2 sensitivity).tw.
16. stereoscopic vision/
17. stereopsis.tw.
18. (stereo adj1 acuit\$).tw.
19. visual field defect/
20. visual field/
21. ((visual\$ or vision) adj2 function\$).tw.
22. or/1-21
23. exp mortality/

24. death/
25. death certificate/
26. mortality.tw.
27. death\$.tw.
28. (fatality or fatalities).tw.
29. or/23-28
30. cohort analysis/
31. longitudinal study/
32. (cohort\$ or longitudinal).tw.
33. cross-sectional study/
34. questionnaire/
35. health survey/ or health care survey/
36. (survey or surveys).tw.
37. or/30-36
38. 22 and 29 and 37
39. (neonate\$ or preterm\$ or prematurity or infant\$ or child\$).tw.
40. visual analog\$ scale.tw.
41. (case adj2 report\$).tw.
42. (animal or mouse or mice or rat or rats).ti.
43. or/39-42
44. 38 not 43
45. limit 44 to conference abstract status
46. 44 not 45

### **Text 3. Global Health**

1. eye diseases/
2. vision/
3. vision disorders/
4. ((low\$ or handicap\$ or subnormal\$ or impair\$ or partial\$ or disab\$ or disorder\$ or loss\$ or limit\$) adj3 (vision or visual\$ or sight\$)).tw.
5. ((macul\$ or retina\$ or choroid\$) adj3 degener\$).tw.
6. ((macul\$ or retina\$ or choroid\$) adj3 neovasc\$).tw.
7. (AMD or ARMD).tw.
8. ((diabet\$ or proliferative or non-proliferative or pre-proliferative) adj4 retinopath\$).tw.
9. (diabet\$ adj2 (eye\$ or vision or visual\$ or sight\$)).tw.
10. glaucoma\$.tw.
11. cataract\$.tw.

12. blindness.tw.
13. visual acuit\$.tw.
14. (contrast adj2 sensitivity).tw.
15. stereopsis.tw.
16. (stereo adj1 acuit\$.tw.
17. ((visual\$ or vision) adj2 function\$.tw.
18. or/1-17
19. mortality/
20. death/
21. "causes of death"/
22. mortality.tw.
23. death\$.tw.
24. (fatality or fatalities).tw.
25. or/19-24
26. cohort studies/
27. longitudinal studies/
28. (cohort\$ or longitudinal).tw.
29. questionnaires/
30. surveys/
31. (survey or surveys).tw.
32. or/26-31
33. 18 and 25 and 32
34. (neonate\$ or preterm\$ or prematurity or infant\$ or child\$.tw.
35. visual analog\$ scale.tw.
36. (case adj2 report\$.tw.
37. (animal or mouse or mice or rat or rats).ti.
38. or/34-37
39. 33 not 38

## APPENDIX 2. PRISMA Checklist

Figure 1.

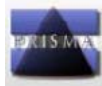

PRISMA 2009 Checklist

| Section/topic                      | #  | Checklist item                                                                                                                                                                                                                                                                                              | Reported on page # |
|------------------------------------|----|-------------------------------------------------------------------------------------------------------------------------------------------------------------------------------------------------------------------------------------------------------------------------------------------------------------|--------------------|
| <b>TITLE</b>                       |    |                                                                                                                                                                                                                                                                                                             |                    |
| Title                              | 1  | Identify the report as a systematic review, meta-analysis, or both.                                                                                                                                                                                                                                         | 1                  |
| <b>ABSTRACT</b>                    |    |                                                                                                                                                                                                                                                                                                             |                    |
| Structured summary                 | 2  | Provide a structured summary including, as applicable: background; objectives; data sources; study eligibility criteria, participants, and interventions; study appraisal and synthesis methods; results; limitations; conclusions and implications of key findings; systematic review registration number. | 2                  |
| <b>INTRODUCTION</b>                |    |                                                                                                                                                                                                                                                                                                             |                    |
| Rationale                          | 3  | Describe the rationale for the review in the context of what is already known.                                                                                                                                                                                                                              | 3                  |
| Objectives                         | 4  | Provide an explicit statement of questions being addressed with reference to participants, interventions, comparisons, outcomes, and study design (PICOS).                                                                                                                                                  | 4                  |
| <b>METHODS</b>                     |    |                                                                                                                                                                                                                                                                                                             |                    |
| Protocol and registration          | 5  | Indicate if a review protocol exists, if and where it can be accessed (e.g., Web address), and, if available, provide registration information including registration number.                                                                                                                               | 4                  |
| Eligibility criteria               | 6  | Specify study characteristics (e.g., PICOS, length of follow-up) and report characteristics (e.g., years considered, language, publication status) used as criteria for eligibility, giving rationale.                                                                                                      | 4                  |
| Information sources                | 7  | Describe all information sources (e.g., databases with dates of coverage, contact with study authors to identify additional studies) in the search and date last searched.                                                                                                                                  | 4                  |
| Search                             | 8  | Present full electronic search strategy for at least one database, including any limits used, such that it could be repeated.                                                                                                                                                                               | 5                  |
| Study selection                    | 9  | State the process for selecting studies (i.e., screening, eligibility, included in systematic review, and, if applicable, included in the meta-analysis).                                                                                                                                                   | 4                  |
| Data collection process            | 10 | Describe method of data extraction from reports (e.g., piloted forms, independently, in duplicate) and any processes for obtaining and confirming data from investigators.                                                                                                                                  | 5                  |
| Data items                         | 11 | List and define all variables for which data were sought (e.g., PICOS, funding sources) and any assumptions and simplifications made.                                                                                                                                                                       | 5                  |
| Risk of bias in individual studies | 12 | Describe methods used for assessing risk of bias of individual studies (including specification of whether this was done at the study or outcome level), and how this information is to be used in any data synthesis.                                                                                      | 5                  |
| Summary measures                   | 13 | State the principal summary measures (e.g., risk ratio, difference in means).                                                                                                                                                                                                                               | 5                  |
| Synthesis of results               | 14 | Describe the methods of handling data and combining results of studies, if done, including measures of consistency (e.g., $I^2$ ) for each meta-analysis.                                                                                                                                                   | 5                  |
| Risk of bias across studies        | 15 | Specify any assessment of risk of bias that may affect the cumulative evidence (e.g., publication bias, selective reporting within studies).                                                                                                                                                                | 5                  |
| Additional analyses                | 16 | Describe methods of additional analyses (e.g., sensitivity or subgroup analyses, meta-regression), if done, indicating which were pre-specified.                                                                                                                                                            | 5                  |

| Section/topic                 | #  | Checklist item                                                                                                                                                                                           | Reported on page # |
|-------------------------------|----|----------------------------------------------------------------------------------------------------------------------------------------------------------------------------------------------------------|--------------------|
| <b>RESULTS</b>                |    |                                                                                                                                                                                                          |                    |
| Study selection               | 17 | Give numbers of studies screened, assessed for eligibility, and included in the review, with reasons for exclusions at each stage, ideally with a flow diagram.                                          | 6                  |
| Study characteristics         | 18 | For each study, present characteristics for which data were extracted (e.g., study size, PICOS, follow-up period) and provide the citations.                                                             | 6                  |
| Risk of bias within studies   | 19 | Present data on risk of bias of each study and, if available, any outcome level assessment (see item 12).                                                                                                | 7                  |
| Results of individual studies | 20 | For all outcomes considered (benefits or harms), present, for each study: (a) simple summary data for each intervention group (b) effect estimates and confidence intervals, ideally with a forest plot. | 7                  |
| Synthesis of results          | 21 | Present results of each meta-analysis done, including confidence intervals and measures of consistency.                                                                                                  | 7                  |
| Risk of bias across studies   | 22 | Present results of any assessment of risk of bias across studies (see Item 15).                                                                                                                          | 7                  |
| Additional analysis           | 23 | Give results of additional analyses, if done (e.g., sensitivity or subgroup analyses, meta-regression [see Item 16]).                                                                                    | 7                  |
| <b>DISCUSSION</b>             |    |                                                                                                                                                                                                          |                    |
| Summary of evidence           | 24 | Summarize the main findings including the strength of evidence for each main outcome; consider their relevance to key groups (e.g., healthcare providers, users, and policy makers).                     | 8                  |
| Limitations                   | 25 | Discuss limitations at study and outcome level (e.g., risk of bias), and at review-level (e.g., incomplete retrieval of identified research, reporting bias).                                            | 8                  |
| Conclusions                   | 26 | Provide a general interpretation of the results in the context of other evidence, and implications for future research.                                                                                  | 9                  |
| <b>FUNDING</b>                |    |                                                                                                                                                                                                          |                    |
| Funding                       | 27 | Describe sources of funding for the systematic review and other support (e.g., supply of data); role of funders for the systematic review.                                                               | 2 & 6              |

From: Moher D, Liberati A, Tetzlaff J, Altman DG, The PRISMA Group (2009). Preferred Reporting Items for Systematic Reviews and Meta-Analyses: The PRISMA Statement. PLoS Med 6(7): e1000097. doi:10.1371/journal.pmed1000097

For more information, visit: [www.prisma-statement.org](http://www.prisma-statement.org).



### APPENDIX 3.

**Figure 1. Random-effects meta-analysis results showing the minimally-adjusted pooled hazard of mortality in adults with mild vision impairment or worse.**

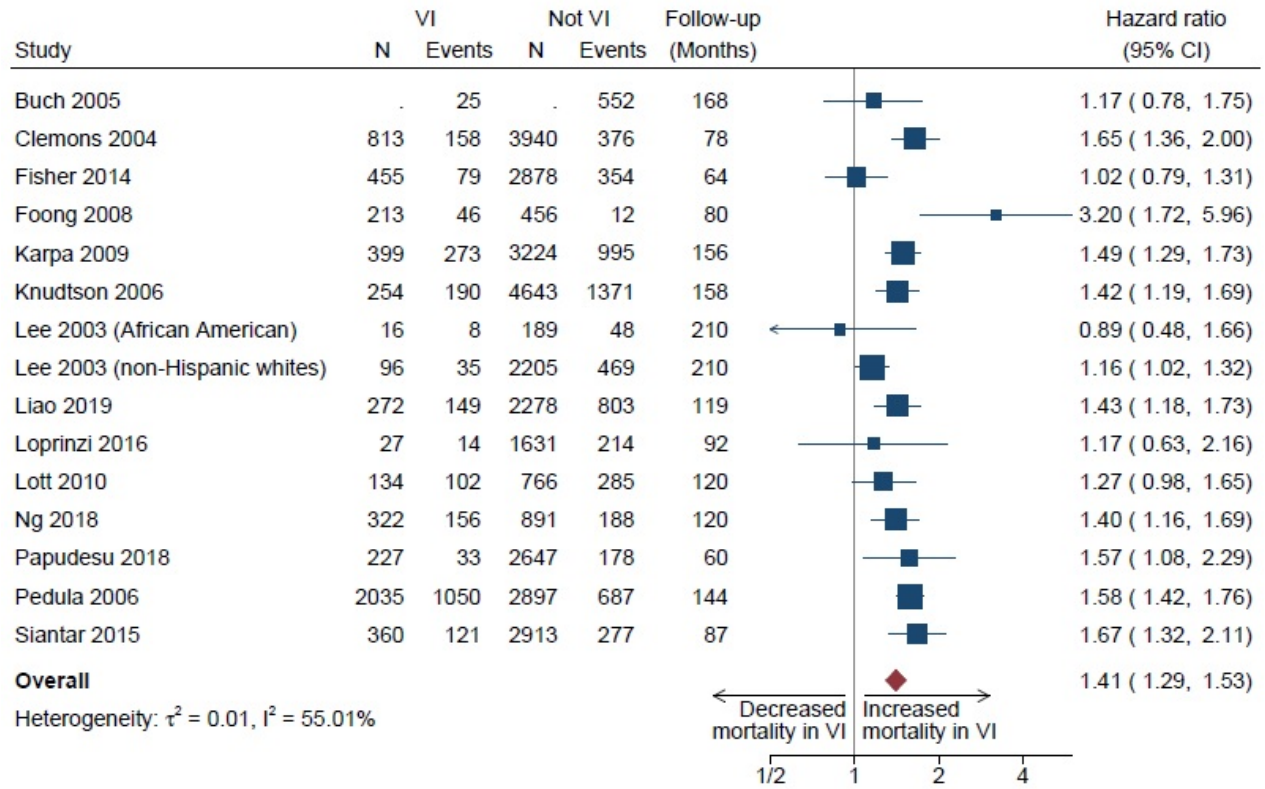

Events are defined as the number of participants in the study who died and n is the total number of participants in the study.

CI: confidence interval, VI: vision impairment

Figure 2. Funnel plot for studies assessing all-cause mortality in adults with mild vision impairment or worse (<6/12 compared with ≥6/12)

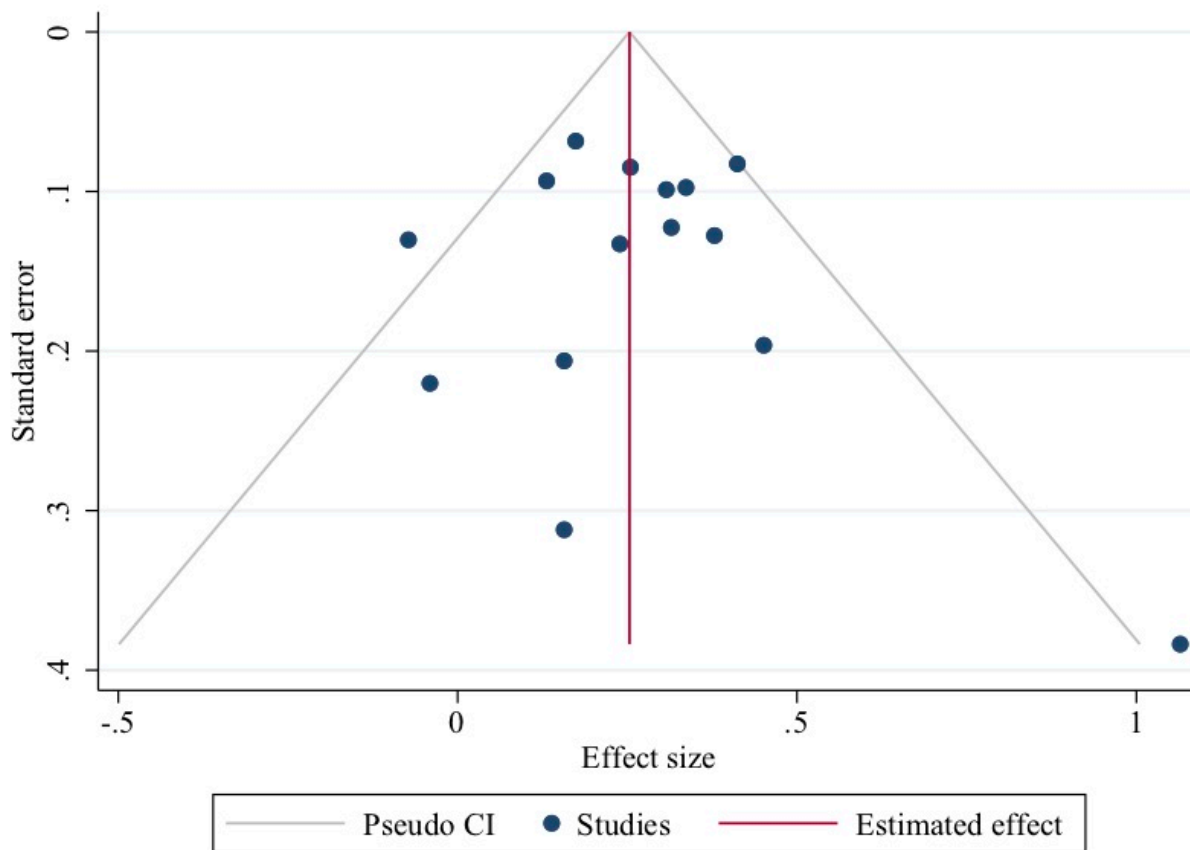

CI: confidence interval
